# Supplementary material for: Comparative effectiveness of ARB and ACEi for cardiovascular outcomes and risk of angioedema among different ethnic groups in England: an analysis in the UK Clinical Practice Research Datalink with emulation of a reference trial (ONTARGET)
Source: bioRxiv or medRxiv preprint supplement (doi:10.1101/2024.01.17.24301397), 2024-02-09
Supplement: Supplementary file [file media-1.pdf]

## STEP 1

Create exposed periods

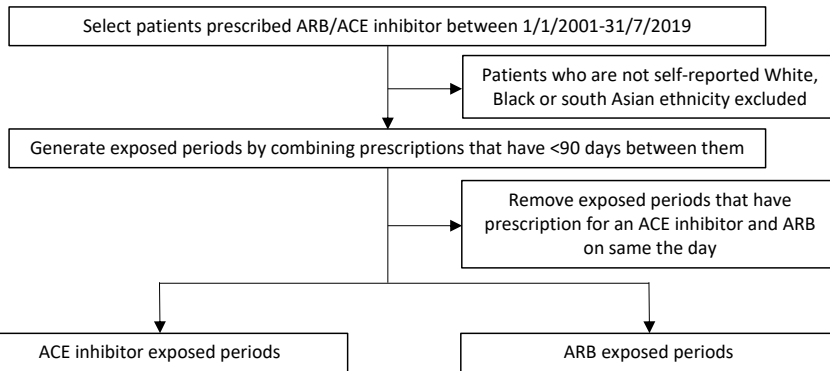

## STEP 2

Create trial-eligible periods

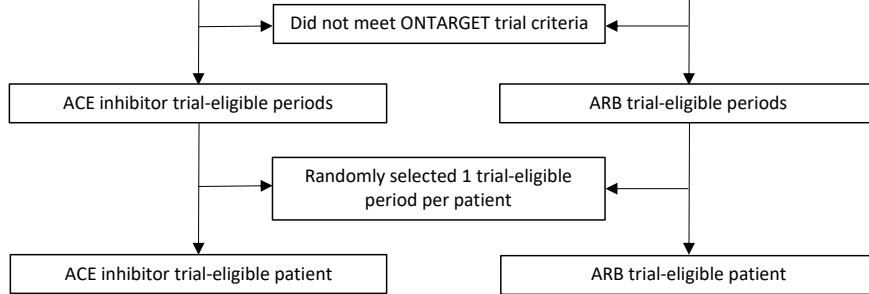

## STEP 3

Balance across exposure groups

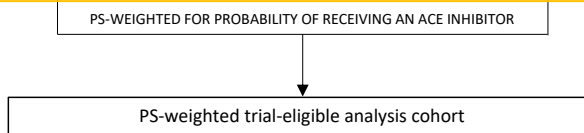

**Supplementary Figure S1.** Steps to define analysis cohort.

PS=propensity score
