# Supplementary material for: Comparative effectiveness of ARB and ACEi for cardiovascular outcomes and risk of angioedema among different ethnic groups in England: an analysis in the UK Clinical Practice Research Datalink with emulation of a reference trial (ONTARGET)
Source: bioRxiv or medRxiv preprint supplement (doi:10.1101/2024.01.17.24301397), 2024-02-09
Supplement: Supplementary file [file media-3.pdf]

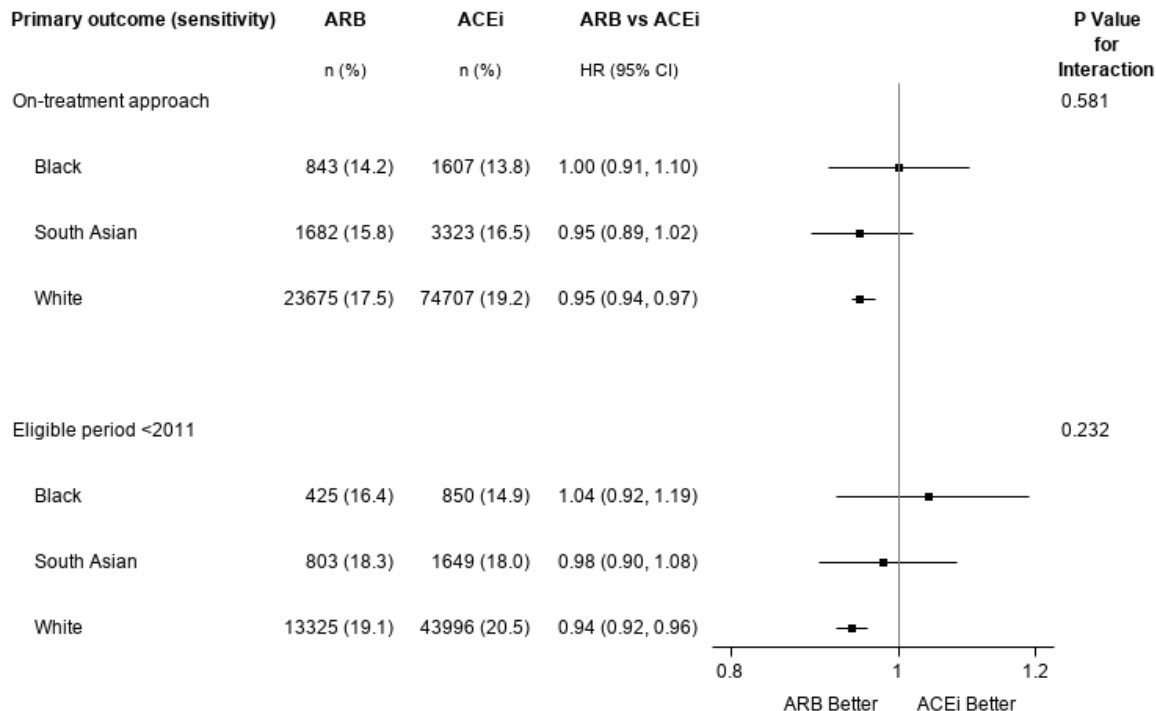

**Supplementary Figure S3.** Forest plot of sensitivity analysis for extending analysis to underrepresented groups using a propensity-score—weighted analysis for ARB vs ACEi use for primary composite outcome. Primary composite outcome is cardiovascular related death, myocardial infarction, stroke, or hospitalisation for heart failure. On-treatment approach censored at treatment discontinuation (i.e., treatment gap of >90 days), switch treatment or start of dual use +60 days. Multiple imputation of missing baseline blood pressure and creatinine using chained equations. Eligible period <2011 is analysis restricted to start of trial-eligible periods prior to 2011. P value is test for heterogeneity using an term interaction between treatment and ethnicity in the Cox proportional hazards model.
